# Supplementary material for: The Cytotoxic and Apoptotic Effects of the Brown Algae Colpomenia sinuosa are Mediated by the Generation of Reactive Oxygen Species
Source: PubMed Central journal article supplement (PMC7221617; doi:10.3390/molecules25081993), 2020-04-24
Supplement: molecules-25-01993-s001.pdf [file molecules-25-01993-s001.pdf]

**The cytotoxic and apoptotic effects of the brown algae *Colpomenia sinuosa* are mediated by the generation of reactive oxygen species**

Table S1. IC<sub>50</sub> of DM, M and Aq extracts of the Lebanese *C. sinuosa* on different cell lines at 24h

| Cell line | <i>C. sinuosa</i> extract | IC50(µg/ml) |             |            |
|-----------|---------------------------|-------------|-------------|------------|
|           |                           | Crude       | fraction    | soxhlet    |
| HCT-116   | M                         | 478.9±1.203 | 481.1±1.164 | 248.4±1.76 |
|           | DM                        | 190.3±1.08  | 255±1.35    | 42.57±1.65 |
|           | Aq                        | 6739±1.42   | 6734±1.14   | 8708±1.23  |
| HT-29     | M                         | 23961±1.4   | 2014±1.61   | 1383±3.27  |
|           | DM                        | 1379±1.02   | 1266±1.61   | 261.5±3.27 |
|           | Aq                        | 1655±1.29   | 4053±1.9    | 1589±1.21  |
| HELA      | M                         | 1778±1.41   | 673.9±1.14  | 614.7±1.29 |
|           | DM                        | 620±1.16    | 660.4±1.2   | 121±1.79   |
|           | Aq                        | 2378±1.61   | 4207±1.25   | 2630±1.33  |
| MCF7      | M                         | 1109±1.29   | 573.3±1.08  | 951.1±1.29 |
|           | DM                        | 646.8±1.242 | 672.2±1.3   | 277.3±1.27 |
|           | Aq                        | 2962±1.78   | 2766±1.33   | 1978±1.48  |

Table S2. IC<sub>50</sub> of DM, M and Aq extracts of the Lebanese *C. sinuosa* on different cell lines at 48h

| Cell line | <i>C. sinuosa</i> extract | IC50(µg/ml) |             |            |
|-----------|---------------------------|-------------|-------------|------------|
|           |                           | Crude       | fraction    | soxhlet    |
| HCT-116   | M                         | 233.2±1.11  | 179.9±1.15  | 192.3±1.12 |
|           | DM                        | 79.3±1.8    | 386.4±1.05  | 12.76±3.54 |
|           | Aq                        | 1630±1.34   | 1091±1.44   | 2617±2.15  |
| HT-29     | M                         | 1383±1.48   | 615.1±1.21  | 691.8±1.19 |
|           | DM                        | 301±1.48    | 234.6±1.21  | 104.6±1.69 |
|           | Aq                        | 1419±1.72   | 2609±1.57   | 1397±1.17  |
| HELA      | M                         | 904±1.3     | 377.2±1.06  | 496.5±1.2  |
|           | DM                        | 612.7±1.11  | 547.9±1.16  | 24.27±1.48 |
|           | Aq                        | 1788±1.23   | 1707±1.29   | 1896±1.96  |
| MCF7      | M                         | 341.8±1.33  | 394.2±1.077 | 172.1±1.08 |
|           | DM                        | 274.5±1.05  | 246.4±1.11  | 166±1.14   |
|           | Aq                        | 1425±1.88   | 1643±1.4    | 1566±1.55  |

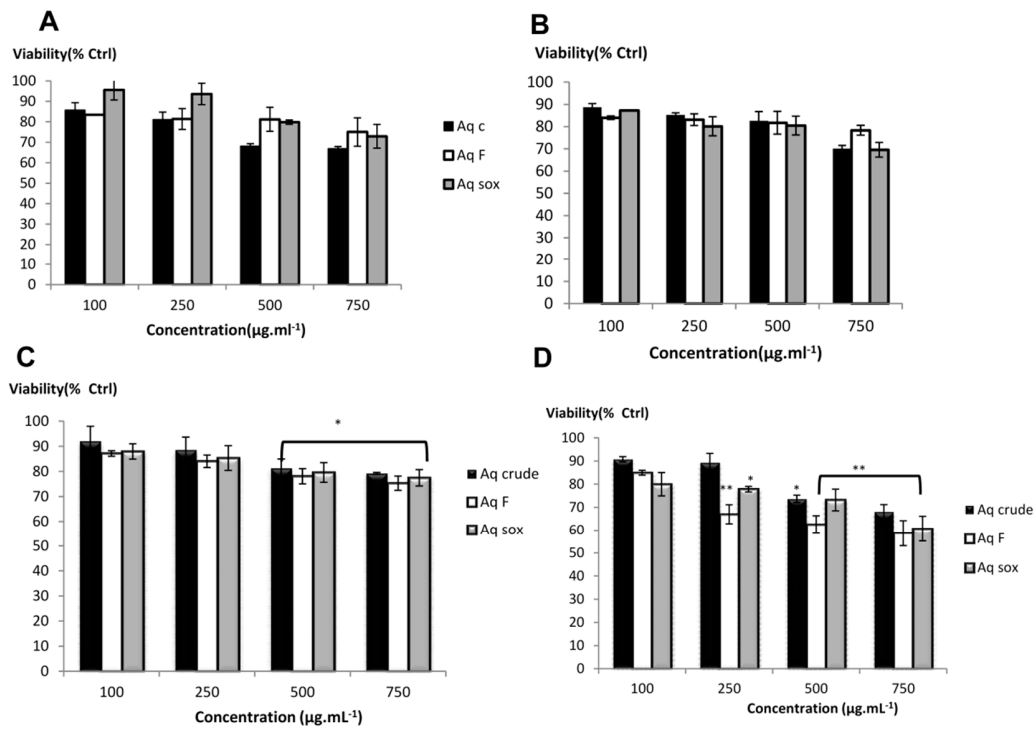

Figure S1 Effect of Aqueous extracts obtained from *C. sinuosa* on HC-T116 (A,B at 24 and 48 h respectively) and HT29 (C,D at 24 and 48h respectively) by MTT assay.

Aq F : Aqueous fraction

Aq sox: Aqueous extract obtained by soxhlet

Aq crude: Crude aqueous extract

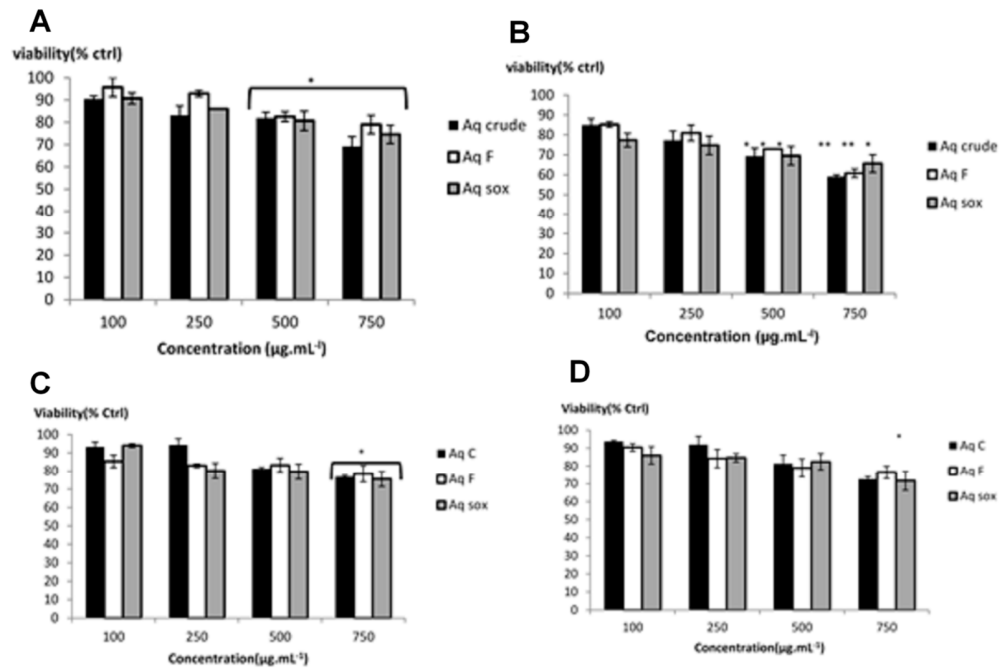

Figure S2 Cytotoxic effect of aqueous extracts against MCF7 at 24 and 48 h (A,B respectively) and HeLa at 24 and 48h (C and D respectively) by MTT assay.

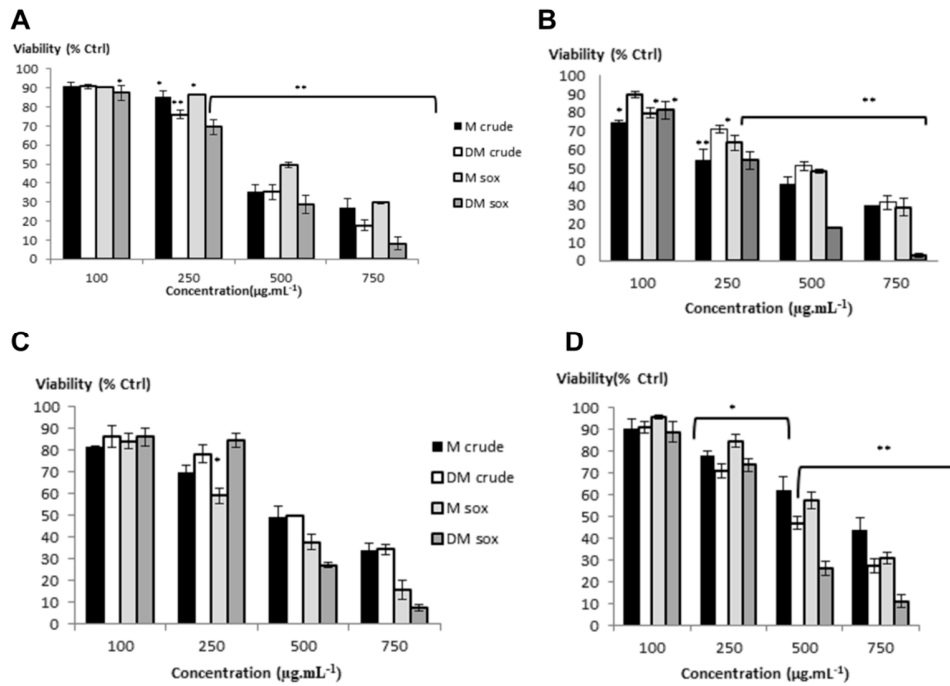

Figure S3 Trypan blue assay confirms the cytotoxic potentials of organic extracts against A. HeLa, B. HCT-116, C. HT-29 and D, MCF7 cell line post 24 h treatment.

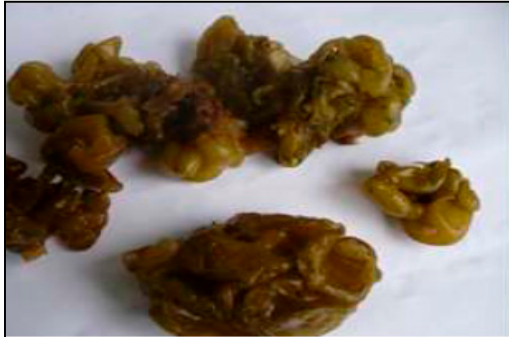

Figure S4 Morphology of *C. sinuosa* collected from the North Lebanese coast

|                         |                        |                       |
|-------------------------|------------------------|-----------------------|
| 20g *4 <i>C.sinuosa</i> |                        |                       |
| Crude                   | Cyclohexane            | 3 days → Negligible   |
|                         | DM (1:1 v/v)           | 3 days → Crude DM     |
|                         | M                      | 3 days → Crude M      |
|                         | Aq                     | 3 days → Crude Aq     |
| 20g <i>C.sinuosa</i>    |                        |                       |
| Sequential              | cyclohexane            |                       |
|                         | ↓                      |                       |
|                         | DM                     | Day 3-6 → DM Fraction |
|                         | ↓                      |                       |
| M                       | Day 6-9 → M Fraction   |                       |
| ↓                       |                        |                       |
| Aq                      | Day 9-12 → Aq Fraction |                       |
| 10g <i>C.sinuosa</i>    |                        |                       |
| Soxhlet                 | DM (1:1 v/v)           | 6 hrs → Soxhlet DM    |
|                         | M                      | 6 hrs → Soxhlet M     |
|                         | Aq                     | 6 hrs → Soxhlet Aq    |

Figure S5 Extraction process of *C. sinuosa*
